# Supplementary material
Source: Springer Nature journal article supplement (https://www.springermedizin.de/resource/supplementary/13012_2013_659_MOESM1_ESM.pdf/9630480)
Supplement: MOESM1 [file 9630480]

|                | Months<br>1 to 6                 | Months<br>7 to 12                    | Months<br>13 to 18 | Months<br>19 to 24                   | Months<br>25 to 30 | Months<br>31 to 36                |
|----------------|----------------------------------|--------------------------------------|--------------------|--------------------------------------|--------------------|-----------------------------------|
| <b>Group 1</b> | Baseline<br>n = 260 <sup>^</sup> | Intervention<br>n = 520 <sup>^</sup> |                    | Follow-up<br>n = 780 <sup>^</sup>    |                    |                                   |
| <b>Group 2</b> | Baseline<br>n = 780 <sup>^</sup> |                                      |                    | Intervention<br>n = 520 <sup>^</sup> |                    | Follow-up<br>n = 260 <sup>^</sup> |

<sup>^</sup>Expected number of completed client CATI interviews
